# Supplementary material for: Pseudomyotonia in Romagnola cattle caused by novel ATP2A1 mutations
Source: PubMed Central journal article supplement (PMC3545862; doi:10.1186/1746-6148-8-186), 2012-10-09
Supplement: 1746-6148-8-186-S2.pdf [file 1746-6148-8-186-S2.pdf]

**Additional file 2** Predicted consequences of bovine SERCA1 mutations.

| Software               | Prediction                                                                      | p.Arg164His<br>(Chianina)              | p.Gly211Val<br>(Romagnola)                                                                | p.Gly286Val<br>(Romagnola)                                                                | p.Arg559Cys<br>(Belgian Blue)        |
|------------------------|---------------------------------------------------------------------------------|----------------------------------------|-------------------------------------------------------------------------------------------|-------------------------------------------------------------------------------------------|--------------------------------------|
| <b>Polyphen 2</b>      | impact of an amino acid substitution on the structure and function of a protein | possibly damaging<br>(score of 0.903 ) | probably damaging<br>(score 1.000 )                                                       | probably damaging<br>(score 0.994 )                                                       | probably damaging<br>(score 1.000 )  |
| <b>Net TurnP</b>       | possible changes in the formation of Beta-turns                                 | *                                      | predicted beta turn not formed in mutant protein                                          | *                                                                                         | *                                    |
| <b>NetSurfP</b>        | surface accessibility and secondary structure                                   | *                                      | *                                                                                         | changes from buried to exposed                                                            | *                                    |
| <b>CFSSP</b>           | secondary structure of protein from the amino acid sequence                     | *                                      | elimination of a turn (two beta-sheets joined)                                            | elimination of a turn                                                                     | *                                    |
| <b>PoPMuSiC</b>        | changes in stability of a given protein or peptide under single-site mutations  | neutral mutation                       | destabilizing mutation                                                                    | destabilizing mutation                                                                    | destabilizing mutation               |
| <b>Phyre 2</b>         | secondary structure and disorder                                                | *                                      | elimination of a turn (two beta-sheets joined)                                            | small alpha helix extended (1 residue)                                                    | increased disorder in 460-472 region |
| <b>TMHMM / THMpred</b> | transmembrane helices and topology of proteins                                  | *                                      | probability decrease in prediction of a transmembrane domain in the M3 subunit by ca. 20% | probability decrease in prediction of a transmembrane domain in the M3 subunit by ca. 20% | *                                    |

\* no change predicted
